# Supplementary material
Source: PubMed Central journal article supplement (PMC6075215)

# **Supplementary Material and Methods**

**Title: Detection of genetic loci associated with plasma fetuin-A: A meta-analysis of genome-wide association studies from the CHARGE Consortium**

## **List of content**

- |                                                          |      |
|----------------------------------------------------------|------|
| 1. Details on Study Samples, genotyping, and imputations | p.2  |
| 2. Laboratory Measurements of Fetuin-A                   | p.7  |
| 3. Statistical Analyses                                  | p.9  |
| 4. Supplemental Tables                                   | p.13 |
| 5. Supplemental Figures                                  | p.31 |

## **Study Samples, genotyping, and imputations**

Participants for the current analysis were drawn from six cohort studies, including the following studies from the CHARGE (Cohorts for Heart and Aging Research in Genome Epidemiology) Consortium: Atherosclerosis Risk in Communities Study (ARIC), the Cardiovascular Health Study (CHS), the Multi-Ethnic Study of Atherosclerosis (MESA), and the Framingham Heart Study (FHS). In addition, data from the Health, Aging, and Body Composition (Health ABC) Study and the Nurses' Health Study (NHS) were also included. Local ethical committees at each institution approved the individual study protocols.

### *The Atherosclerosis Risk in Communities (ARIC):*

The ARIC study is a longitudinal cohort study of atherosclerosis and its clinical sequelae. Investigators recruited a population-based sample of 15,792 men and women aged 45–64 years from four U.S. communities in 1987-89(1). Fetuin-A was measured in a case-cohort sample designed to investigate predictors of incident diabetes. The cohort was stratified by ethnicity (white / black) and sampling frequencies for cases and the cohort sample varied across strata. Genotyping was performed using the Affymetrix 6.0 Gene Chip V6.0. SNPs were excluded for not being autosomal SNPs, not passing laboratory QC, no chromosome location, being monomorphic, SNP call rate <95%, Hardy-Weinberg equilibrium  $p$ -value <  $10^{-5}$ . Following genotyping, the subjects with a call rate < 95%, with a mismatch between called and phenotypic gender, with a mismatch on >10 of 47 previously analyzed SNPs in ARIC, all but one in sets of first degree relatives, and genetic outliers. Imputation to approximately 2.5 million HapMap SNPs was performed

using MACH. In total, 485 European American and 366 African American participants with genotypes and fetuin-A measures were available for the genome-wide association study.

*Cardiovascular Health Study (CHS):*

The CHS is a population-based cohort study of risk factors for CHD and stroke in adults  $\geq 65$  years conducted across four field centers.(2) The original predominantly European ancestry cohort of 5,201 persons was recruited in 1989-1990 from random samples of the Medicare eligibility lists and an additional 687 African-Americans were enrolled in 1992-1993 for a total sample of 5,888. The study consisted of baseline and follow-up clinic visits that collected clinical and medical history information. DNA was extracted from blood samples drawn on all participants at their baseline examination. In 2007–2008, genotyping was performed at the General Clinical Research Center's Phenotyping/Genotyping Laboratory at Cedars-Sinai using the Illumina 370CNV BeadChip system on CHS participants who were free of CVD at baseline, consented to genetic testing, and had DNA available for genotyping. Following genotyping, participants were excluded if they had a call rate  $\leq 95\%$  or if their genotype was discordant with known sex or prior genotyping (to identify possible sample swaps). Genotyping was attempted in 4,129 participants and was successful in 3,869 persons. Imputation to approximately 2.5 million HapMap SNPs was performed using BIMBAM. SNPs for which testing Hardy–Weinberg equilibrium resulted in  $p < 10^{-5}$  (CHS) were excluded from imputation. After excluding subjects with no fetuin-A

measures, the final study population comprised 2742 European Americans and 725 African Americans.

*Framingham Heart Study (FHS):* The FHS started in 1948 with 5,209 randomly ascertained participants from Framingham, Massachusetts, United States, who had undergone biannual examinations to investigate cardiovascular disease and its risk factors. In 1971, the Offspring cohort (comprised of 5,124 children of the Original cohort, and children's spouses),(3) and in 2002, the Third Generation (consisting of 4,095 children of the Offspring cohort), were recruited. FHS participants are primarily white, of European ancestry. Genotyping was carried out as a part of the SHARe project ([http://www.ncbi.nlm.nih.gov/projects/gap/cgi-bin/study.cgi?study\\_id=phs000007.v10.p5](http://www.ncbi.nlm.nih.gov/projects/gap/cgi-bin/study.cgi?study_id=phs000007.v10.p5)) using the Affymetrix 500K mapping array (250K Nsp and 250K Sty arrays) and the Affymetrix 50K supplemental gene focused array. Genotyping resulted in 503,551 SNPs with successful call rate >95% and Hardy-Weinberg equilibrium  $>10^{-6}$ . Imputation of 2,543,887 autosomal SNPs in HapMap release 22, build 36, CEU sample was conducted using the algorithm implemented in MACH (version 1.0.15). The final sample for the fetuin-A analysis included 3592 individuals. The Framingham Heart Study was approved by the institutional review boards of Boston University and the National Institutes of Health. All participants provided written informed consent.

*The Health, Aging, and Body Composition (Health ABC) study:*

Health ABC is a longitudinal, prospective cohort of well-functioning older men and women recruited from Memphis, TN and Pittsburgh, PA from Medicare beneficiary

records. Recruitment began in 1997-1998 when participants were between 70 and 79 years of age and entry into study was dependent on participants' ability to walk one-quarter mile and climb 10 steps without difficulty. Genomic DNA was extracted from buffy coat collected using PUREGENE® DNA Purification Kit during the baseline exam. In 2009, genotyping was performed by the Center for Inherited Disease Research (CIDR) using the Illumina Human1M-Duo BeadChip system. Samples were excluded from the dataset for the reasons of sample failure, genotypic sex mismatch, and first degree relative of an included individual based on genotype data. Genotyping was successful in 1663 Caucasians and 1139 African Americans. Before imputation, genotypes were available on 914,263 SNPs that met the criteria of call rate < 97%, HWE  $p < 10^{-6}$ , and MAF < 1%. Imputation was done with MACH (version 1.0.16) and the (NCBI build) Hapmap CEU release 22 build 36 backbone. Fetuin-A was measured on baseline specimens in 753 of the genotyped individuals.

#### *The Multi-Ethnic Study of Atherosclerosis (MESA) study*

MESA is a prospective cohort study of 6,814 men and women aged 45–84 years recruited from 6 US communities (Baltimore, MD; Chicago, IL; Forsyth County, NC; Los Angeles County, CA; northern Manhattan, NY; and St. Paul, MN). MESA was designed to determine the characteristics of subclinical cardiovascular disease and its progression, hence adults were considered and individuals with symptoms or history of medical or surgical treatment for cardiovascular disease were excluded. Participants were enrolled between July 2000 and August 2002 and self-reported their race/ethnicity group as Caucasian or white, African American or black, Spanish/Hispanic/Latino, or Chinese

American. Affymetrix 6.0 SNP array genotyping of MESA samples with genotype quality control (QC) steps included the exclusion of individuals with >10% missing data, and the exclusion of SNPs with call rates <95. We used IMPUTE2 to impute untyped SNPs.

### *The Nurses' Health Study*

The NHS is a prospective cohort study of 121,700 female registered nurses who were 30 to 55 years old at study inception in 1976. In 1990-1994, blood samples were collected from participants free of CVD and cancer. Study samples included in GWAS were of European ancestry and nested case control studies were initially designed to address various chronic diseases. Details regarding the study design, genotyping quality control, and assurance of these GWASs have been reported elsewhere.(4, 5) Briefly, genotyping was performed using the Affymetrix 6.0 Gene Chip V6.0 and the Birdseed calling algorithm. Genotypic data for a total of 96% of the samples passed laboratory technical quality control criteria and missing call rate <0.05. The GWAS was restricted to samples without substantial evidence of non-European genetic ancestry (n=24 excluded). SNPs that were monomorphic, had a missing call rate  $\geq 2\%$ , a HWE p-value  $< 1 \times 10^{-4}$ , or a MAF  $< 0.02$  were excluded, leaving a total of 721,316 SNPs. Imputation of ~2.5 million SNPs was performed using MACH software (v1.0.16) with HapMap CEU phased II data (Release 22) as the reference panel. The study was approved by the institutional review boards at Brigham and Women's Hospital and Harvard School of Public Health. After excluding participants with these chronic diseases at baseline, a total of 1029 initially healthy women who were part of the case control studies of type 2 diabetes (n=288) and coronary heart disease (n=741), were analyzed separately for the GWAS of fetuin-A

levels.

### **Laboratory Measurements of Fetuin-A**

*ARIC:* Samples were collected at the baseline (1987-89) study visit and stored at -70° Celsius until 2009 when they were thawed and fetuin-A levels were measured in plasma using an enzyme linked immunosorbent assay kit (Epitope Diagnostics, San Diego, CA). The measurements were conducted at the ARIC Lipid Laboratory at Baylor College of Medicine. The assay uses a 2-site “sandwich” technique with polyclonal antibodies that bind different epitopes of human fetuin-A. Serum samples were measured twice in each participant, and results were averaged. The reliability coefficient estimated from 38 pairs of blind replicate samples was 0.77, and the overall CV from these replicates was 8%.

*CHS:* Samples were collected at the 1992-93 study visit and stored at -70° Celsius until 2010 when it was thawed and fetuin-A levels were measured in plasma using an enzyme linked immunosorbent assay kit (Epitope Diagnostics, San Diego, CA). The measurements were conducted at the CHS Central Blood Analysis Laboratory at the University of Vermont (Burlington, VT). The assay uses a 2-site “sandwich” technique with polyclonal antibodies that bind different epitopes of human fetuin-A. Plasma samples were measured twice in each participant, and results were averaged. The coefficients of variation (CV) ranged between 3 and 9%, with a mean CV of 6%.

*FHS:* **The study sample was derived from 4095 participants in the Framingham Third Generation cohort, in total 3592 individuals had both genotype and fetuin-A**

measures available for analyses. Serum fetuin-A was measured in mg/L from fasting samples using a commercially available kit from Biovendor (Candler, NC). The mean interassay CV was 2.4%. (6)

*HABC*: Samples were collected at baseline (April 1997 to June 1998) study visit and stored until 2007 when fetuin-A levels were measured in serum using a human fetuin-A enzyme linked immunosorbent assay (ELISA) kit (Epitope Diagnostics, San Diego, CA). The assay uses a two-site “sandwich” technique with two polyclonal antibodies that bind to different epitopes of human fetuin-A. Measurements were performed at the Laboratory for Clinical Biochemistry Research at the University of Vermont. Fetuin-A was measured twice for each participant and results were averaged in g/L. Intra-assay and interassay coefficients of variation were less than 5%. (7)

*MESA*: Venous blood samples were collected at the baseline visit 2002-2002 and serum was frozen at -70 °C. In 2009, specimens were thawed and fetuin-A was measured at the Clinical Chemistry Laboratory at the University of Maryland with a human ELISA kit (Epitope Diagnostics). Average CV was 5%.

*NHS*: Between 1989 and 1990, a blood sample was requested from all active participants in NHS and collected from 32,826 women. Blood samples were collected in tubes treated with liquid sodium heparin, placed on ice packs, stored in Styrofoam containers, returned to our laboratory by overnight courier, centrifuged, and divided into aliquots for storage in liquid-nitrogen freezers (-130°C or colder) until 2010 when it was thawed and fetuin-A levels were measured in plasma using an enzyme linked immunosorbent assay kit



(Epitope Diagnostics, R & D). The measurements were conducted in the blood laboratory of Nader Rifai (Boston, MA). The overall CV for Fetuin A, calculated from masked replicate quality control samples placed in each batch, was 15%. Furthermore, the spearman correlation and intraclass correlation between samples collected 1 year apart from the same participants was  $r=0.9$ .

### **Statistical Analyses within Each Cohort**

The statistical analyses were performed separately in each cohort using the software programs R (CHS, MESA, FHS,) and ProbABEL (ARIC, NHS, HABC). Additive genetic effects were assumed in all analyses, and each analysis adjusted for age, sex, field center, and population stratification, where appropriate. To measure potential inflation in type-I error, a genomic control lambda was computed for each cohort separately.  $\lambda_{gc}$  values in European Americans were CHS: 1.024, ARIC: 1.004, HABC: 0.996, MESA: 1.001, NHS: 1.004, FHS: 0.999, resulting in an overall of 1.025 and in African Americans they were CHS: 1.027, ARIC: 1.006, HABC: 0.977, MESA: 0.985, resulting in an overall lambda of 1.007.

In ARIC, mutually exclusive sets of cases and controls were selected from the case-cohort sample to simplify the design and analysis; cases and controls were analyzed separately but were not otherwise weighted by selection probabilities.

In NHS, that data on fetuin-A was available on a subset of cases and control of a nested case-control study of CHD. Thus, analyses were conducted in the combined populations with adjustment for case-control status (though all individuals were free of CVD at the time of genotyping and fetuin-A measurements).

In FHS, the `lmekin` function from the R kinship package was used to fit linear mixed effect models to account for familial relationships by using subject-specific random effects that are correlated within family with correlation proportional to kinship coefficients between family members.

### **Meta-analysis**

We performed inverse variance–weighted fixed-effect meta-analyses in European and African Americans separately, as implemented in the software METAL.(38) The p-value threshold of genome-wide significance was chosen as  $5 \times 10^{-8}$ , which corresponds to a Bonferroni correction for an estimated 1 million independent tests in the genome of European descendants.(8) For the conditional analysis, we performed meta-analysis similarly, combining the point estimates and standard errors for each cohort's estimates based on a model that adjusted for rs4917.

## References

- 1 The ARIC Investigators. (1989) The Atherosclerosis Risk in Communities (ARIC) Study: design and objectives. *The ARIC investigators. Am. J. Epidemiol.*, 129, 687-702.
- 2 Fried, L.P., Borhani, N.O., Enright, P., Furberg, C.D., Gardin, J.M., Kronmal, R.A., Kuller, L.H., Manolio, T.A., Mittelmark, M.B., Newman, A. et al. (1991) The Cardiovascular Health Study: Design and rationale. *Ann. Epidemiol.*, 1, 263-276.
- 3 Kannel, W.B. and McGee, D.L. (1979) Diabetes and cardiovascular diseases: The Framingham Study. *JAMA.*, 241, 2035-2038.
- 4 Jensen, M.K., Pers, T.H., Dworzynski, P., Girman, C.J., Brunak, S. and Rimm, E.B. (2011) Protein interaction-based genome-wide analysis of incident coronary heart disease. *Circ. Cardiovasc. Genet.*, 4, 549-556.
- 5 Qi, L., Cornelis, M.C., Kraft, P., Stanya, K.J., Linda Kao, W.H., Pankow, J.S., Dupuis, J., Florez, J.C., Fox, C.S., Pare, G. et al. (2010) Genetic variants at 2q24 are associated with susceptibility to type 2 diabetes. *Hum. Mol. Genet.*, 19, 2706-2715.
- 6 Kaess, B.M., Enserro, D.M., McManus, D.D., Xanthakis, V., Chen, M.H., Sullivan, L.M., Ingram, C., O'Donnell, C.J., Keaney, J.F., Vasan, R.S. et al. (2012) Cardiometabolic correlates and heritability of fetuin-A, retinol-binding protein 4, and fatty-acid binding protein 4 in the Framingham Heart Study. *J. Clin. Endocrinol. Metab.*, 97, 2012-1458.
- 7 Ix, J.H., Wassel, C.L., Kanaya, A.M., Vittinghoff, E., Johnson, K.C., Koster, A., Cauley, J.A., Harris, T.B., Cummings, S.R. and Shlipak, M.G. (2008) Fetuin-A and incident diabetes mellitus in older persons. *JAMA.*, 300, 182-188.

8 Pe'er, I., Yelensky, R., Altshuler, D. and Daly, M.J. (2008) Estimation of the multiple testing burden for genomewide association studies of nearly all common variants. *Genet. Epidemiol.*, 32, 381-385

## Supplemental Tables

**Table S1.** Description of the study populations. European Americans

|                            | <b>COHORT</b>            | <b>CHS</b>                                                                 | <b>ARIC</b>                                                                | <b>HABC</b>                                                                              | <b>MESA</b>                                                                | <b>NHS</b>                                                               | <b>FHS</b>                                                     |
|----------------------------|--------------------------|----------------------------------------------------------------------------|----------------------------------------------------------------------------|------------------------------------------------------------------------------------------|----------------------------------------------------------------------------|--------------------------------------------------------------------------|----------------------------------------------------------------|
| <b>COHORT INFORMATION</b>  | <b>Ethnicity</b>         | European descent                                                           | European descent                                                           | European descent                                                                         | European descent                                                           | European descent                                                         | European descent                                               |
|                            | <b>Country</b>           | USA                                                                        | USA                                                                        | USA                                                                                      | USA                                                                        | USA                                                                      | USA                                                            |
|                            | <b>Collection type</b>   | Population-based                                                           | Population-based                                                           | Population-based, medicare eligible adults over age 70 in Pittsburgh, PA and Memphis, TN | Population-based                                                           | Population-based                                                         | Population-based                                               |
| <b>FETUIN MEASUREMENTS</b> | <b>Sample</b>            | fasting plasma                                                             | fasting plasma                                                             | fasting plasma                                                                           | fasting serum                                                              | 70% fasting plasma                                                       | fasting serum                                                  |
|                            | <b>Collection method</b> | venipuncture                                                               | Venipuncture                                                               | Venipuncture                                                                             | venipuncture                                                               | venipuncture                                                             | venipuncture                                                   |
|                            | <b>Assay</b>             | enzyme linked immunosorbent assay kit (Epitope Diagnostics, San Diego, CA) | enzyme linked immunosorbent assay kit (Epitope Diagnostics, San Diego, CA) | enzyme linked immunosorbent assay kit (Epitope Diagnostics, San Diego, CA)               | enzyme linked immunosorbent assay kit (Epitope Diagnostics, San Diego, CA) | enzyme linked immunosorbent assay kit (Epitope Diagnostics, R&D systems) | enzyme linked immunosorbent assay kit (Biovendor, Candler, NC) |
|                            | <b>Reference (PMID)</b>  | PMID: 22511752                                                             |                                                                            | PMID: 18612115                                                                           | PMID: 22511752                                                             | PMID: 22923470                                                           | PMID: 22855337                                                 |

|                   |                                                                |                                                                                      |                                    |                       |                 |                                                      |                                               |
|-------------------|----------------------------------------------------------------|--------------------------------------------------------------------------------------|------------------------------------|-----------------------|-----------------|------------------------------------------------------|-----------------------------------------------|
| <b>GENOTYPING</b> | <b>Genotyping platform and SNP panel</b>                       | Illumina HumanCNV370-Duo BeadChip                                                    | Affy 6.0                           | Illumina 1M           | Affy6.0         | Affy 6.0                                             | Affymetrix 50K<br>Affymetrix 50K supplemental |
|                   | <b>Genotyping centre</b>                                       | General Clinical Research Center's Phenotyping/Genotyping Laboratory at Cedars-Sinai | BROAD Institute of MIT and Harvard | CIDR                  | Broad Institute | Rosetta/Merck Research Laboratories, North Wales, PA |                                               |
|                   | <b>Genotyping calling algorithm</b>                            | Illumina BeadStudio software                                                         | Birdseed                           | Illumina GenomeStudio | Birdseed v1.33  | Birdseed                                             | Affymetrix                                    |
| <b>SAMPLE QC</b>  | <b>Call rate [filter detail / N individuals excluded]</b>      | < 95%                                                                                | < 95%                              | 97%                   | 95%             | >95%                                                 | <97%                                          |
|                   | <b>Heterozygosity [filter detail / N individuals excluded]</b> | none                                                                                 | none                               | N/A                   | none            | none                                                 | none                                          |

|                                     |                                                    |                      |                                                                                                                       |                                                                                                                                                                                                                                 |                 |                      |            |
|-------------------------------------|----------------------------------------------------|----------------------|-----------------------------------------------------------------------------------------------------------------------|---------------------------------------------------------------------------------------------------------------------------------------------------------------------------------------------------------------------------------|-----------------|----------------------|------------|
|                                     | <b>Ethnic outliers / other exclusions</b>          | non-European descent | mismatch on sex / mismatches with > 10 of 47 previously analyzed SNPs / all but one in sets of first degree relatives | genotype was discordant with known sex or prior genotyping, no first degree relatives (IBD exclusion at > 0.125, keeping random proband), Within expected distance from eigenvectors for relevant HapMap3 reference populations | Ethnic outliers | non-European descent |            |
| <b>SNP QC (prior to imputation)</b> | <b>MAF [filter detail / N SNPs excluded]</b>       | none                 | <0.01                                                                                                                 | > 0.01                                                                                                                                                                                                                          | 0.01            | <0.02                | <0.01      |
|                                     | <b>HWE [filter detail / N SNPs excluded]</b>       | P > 10-5             | P < 10-5                                                                                                              | 1.00E-05                                                                                                                                                                                                                        | -               | P > 10-4             | HWE p<1E-6 |
|                                     | <b>Call rate [filter detail / N SNPs excluded]</b> | <97%                 | < 95%                                                                                                                 | 0.97                                                                                                                                                                                                                            | <97%            | <97%                 | <97%       |

|                         |                                      |                                                                                                                                    |                         |                                                                                            |               |                                                                                            |                                                                                            |
|-------------------------|--------------------------------------|------------------------------------------------------------------------------------------------------------------------------------|-------------------------|--------------------------------------------------------------------------------------------|---------------|--------------------------------------------------------------------------------------------|--------------------------------------------------------------------------------------------|
|                         | <b>Other</b>                         | <=2 duplicate errors or Mendelian inconsistencies (for reference CEPH trios), heterozygote frequency = 0, SNP not found in HapMap. |                         | Non-random missing by Haplotype p-value < !E-5                                             |               | Y chromosome                                                                               | mishap p<1e-9; >100 Mendelian errors; not available on Hapmap                              |
|                         | <b>SNP number in QC'd dataset</b>    | 306655                                                                                                                             | 669,450                 | 899818                                                                                     | 881666        | 721,316                                                                                    | 378,163                                                                                    |
| <b>IMPUTATION STATS</b> | <b>Imputation software</b>           | BIMBAM v0.99 with reference to HapMap CEU using release 22, build 36                                                               | MACH software (v1.0.16) | MACH software (v1.0.16) with HapMap CEU phased II data (Release 22) as the reference panel | IMPUTE2       | MACH software (v1.0.16) with HapMap CEU phased II data (Release 22) as the reference panel | MACH software (v1.0.15) with HapMap CEU phased II data (Release 22) as the reference panel |
|                         | <b>Imputation quality metrics</b>    | observed/expected variance ratio < 0.01                                                                                            | r <sup>2</sup> > 0.3    | RSQR                                                                                       | info>0.4      | r <sup>2</sup>                                                                             | observed/expected variance ratio                                                           |
|                         | <b>Other SNP QC filters applied?</b> | dosage variance <0.01                                                                                                              | none                    | N/A                                                                                        |               | none                                                                                       | None                                                                                       |
| <b>DATA ANALYSIS</b>    | <b>Number of SNPs in analysis</b>    | 2,396,830                                                                                                                          | 2,536,535               | 2,481,240                                                                                  | 2,545,377     | 2,472,017                                                                                  | 2,535,623                                                                                  |
|                         | <b>Trait transformation Fetuin</b>   | untransformed                                                                                                                      | untransformed           | Untransformed                                                                              | untransformed | untransformed                                                                              | untransformed                                                                              |



|                                                               |                                                                            |                              |                                                                             |                                       |                                                                                      |                                   |                               |
|---------------------------------------------------------------|----------------------------------------------------------------------------|------------------------------|-----------------------------------------------------------------------------|---------------------------------------|--------------------------------------------------------------------------------------|-----------------------------------|-------------------------------|
|                                                               | <b>Adjustments</b>                                                         | age,age2 sex,<br>clinic site | age, age2, sex,<br>clinic site<br>(stratified on<br>case-control<br>status) | age,age2 sex,<br>clinic site, pcs 1-2 | age, age2, gender,2<br>PCs                                                           | age, age2, case<br>control status | age,age2,sex                  |
|                                                               | <b>Analysis<br/>method</b>                                                 | linear regression            | linear regression                                                           | linear regression                     | linear regression                                                                    | linear regression                 | linear mixed<br>effects model |
|                                                               | <b>Software for<br/>analysis</b>                                           | R                            | ProbABEL with<br>robust option                                              | mach2qtl                              | SNPTEST                                                                              | ProbABEL                          | R                             |
|                                                               | <b>Genomic<br/>Control<br/>Lambda</b>                                      | 1.024                        | 1.004                                                                       | 0.996                                 | 1.001                                                                                | 0.985                             | 0.999                         |
| <b>Percentage<br/>of Variance<br/>Explained<br/>by rs4917</b> | <b>adjusted r2 for<br/>full model:<br/>fetuin ~ age +<br/>sex + rs4917</b> | 0.223                        | 0.315                                                                       | 0.02954                               | 0.1567<br>(in MESA the SNP<br>in strongest LD with<br>rs4917 was used:<br>rs2248690) | 0.1383                            | 0.11132                       |
|                                                               | <b>adjusted r2 for<br/>basic model:<br/>fetuin ~ age +<br/>sex</b>         | 0.0288                       | 0.002                                                                       | 0.001249                              | 0.0421                                                                               | 0.0102                            | 0.0203658                     |
|                                                               |                                                                            | 0.1942                       | 0.313                                                                       | 0.028291                              | 0.1146                                                                               | 0.1281                            | 0.1113176                     |
| <b>REFEREN<br/>CES</b>                                        | <b>Reference<br/>cohort (PMID)</b>                                         | PMID: 1669507                | PMID: 2646917                                                               | PMID: 10865790                        | PMID:12397006                                                                        | PMID: 9065374                     |                               |
|                                                               | <b>Reference<br/>GWAS (PMID)</b>                                           | PMID: 20031568               | PMID: 20031568                                                              | None                                  | PMID:12397006                                                                        | PMID: 21880673                    |                               |

**Table S2.** Description of the study populations. African Americans

|                            | <b>COHORT</b>                            | <b>CHS</b>                                                                 | <b>ARIC</b>                                                                | <b>HABC</b>                                                                              | <b>MESA</b>                                                                |
|----------------------------|------------------------------------------|----------------------------------------------------------------------------|----------------------------------------------------------------------------|------------------------------------------------------------------------------------------|----------------------------------------------------------------------------|
| <b>COHORT INFORMATION</b>  | <b>Ethnicity</b>                         | African Americans                                                          | African Americans                                                          | African American                                                                         | African Americans                                                          |
|                            | <b>Country</b>                           | USA                                                                        | USA                                                                        | USA                                                                                      | USA                                                                        |
|                            | <b>Collection type</b>                   | Population-based                                                           | Population-based                                                           | Population-based, medicare eligible adults over age 70 in Pittsburgh, PA and Memphis, TN | Population-based                                                           |
| <b>FETUIN MEASUREMENTS</b> | <b>Sample</b>                            | fasting plasma                                                             | fasting plasma                                                             | fasting plasma                                                                           | Fasting serum                                                              |
|                            | <b>Collection method</b>                 | venipuncture                                                               | Venipuncture                                                               | venipuncture                                                                             | Venipuncture                                                               |
|                            | <b>Assay</b>                             | enzyme linked immunosorbent assay kit (Epitope Diagnostics, San Diego, CA) | enzyme linked immunosorbent assay kit (Epitope Diagnostics, San Diego, CA) | enzyme linked immunosorbent assay kit (Epitope Diagnostics, San Diego, CA)               | enzyme linked immunosorbent assay kit (Epitope Diagnostics, San Diego, CA) |
| <b>GENOTYPING</b>          | <b>Genotyping platform and SNP panel</b> | Illumina HumanOmni1-Quad_v1 BeadChip system                                | Affy 6.0                                                                   | Illumina 1M                                                                              | Affy6.0                                                                    |

|                  |                                                                |                                                                                      |                                                                                                                       |                                                                                                                                                                                                                                 |                 |
|------------------|----------------------------------------------------------------|--------------------------------------------------------------------------------------|-----------------------------------------------------------------------------------------------------------------------|---------------------------------------------------------------------------------------------------------------------------------------------------------------------------------------------------------------------------------|-----------------|
|                  | <b>Genotyping centre</b>                                       | General Clinical Research Center's Phenotyping/Genotyping Laboratory at Cedars-Sinai | BROAD Institute of MIT and Harvard                                                                                    | CIDR                                                                                                                                                                                                                            | Broad Institute |
|                  | <b>Genotyping calling algorithm</b>                            | Illumina GenomeStudio                                                                | Birdseed                                                                                                              | Illumina GenomeStudio                                                                                                                                                                                                           | Birdseed v1.33  |
|                  | <b>Call rate [filter detail / N individuals excluded]</b>      | 95%                                                                                  | < 95%                                                                                                                 | 97%                                                                                                                                                                                                                             | 95%             |
|                  | <b>Heterozygosity [filter detail / N individuals excluded]</b> |                                                                                      | None                                                                                                                  | N/A                                                                                                                                                                                                                             | N/A             |
| <b>SAMPLE QC</b> | <b>Ethnic outliers / other exclusions</b>                      | genotype was discordant with known sex or prior genotyping                           | mismatch on sex / mismatches with > 10 of 47 previously analyzed SNPs / all but one in sets of first degree relatives | genotype was discordant with known sex or prior genotyping, no first degree relatives (IBD exclusion at > 0.125, keeping random proband), Within expected distance from eigenvectors for relevant HapMap3 reference populations | Ethnic outliers |

|                                         |                                                             |                                                                                                              |                         |                                                   |          |
|-----------------------------------------|-------------------------------------------------------------|--------------------------------------------------------------------------------------------------------------|-------------------------|---------------------------------------------------|----------|
|                                         | <b>MAF</b><br>[filter detail /<br>N SNPs<br>excluded]       | NA                                                                                                           | <0.01                   | > 0.01                                            | 0.01     |
| <b>SNP QC (prior to<br/>imputation)</b> | <b>HWE</b><br>[filter detail /<br>N SNPs<br>excluded]       | 1.00E-05                                                                                                     | P < 10-5                | 1.00E-05                                          | -        |
|                                         | <b>Call rate</b><br>[filter detail /<br>N SNPs<br>excluded] | 0.97                                                                                                         | < 95%                   | 0.97                                              | <97%     |
|                                         | <b>Other</b>                                                | 1 duplicate error or<br>Mendelian inconsistency<br>(for reference CEPH trios),<br>heterozygote frequency = 0 |                         | Non-random missing by<br>Haplotype p-value < !E-5 |          |
|                                         | <b>SNP number<br/>in QC'd<br/>dataset</b>                   | 963248                                                                                                       | 669,450                 | 992212                                            | 881666   |
|                                         | <b>Imputation<br/>software</b>                              | BEAGLE version 3.2.1<br>using the default value of 10<br>iterations                                          | MACH software (v1.0.16) | MACHv1.16                                         | IMPUTE2  |
| <b>IMPUTATION<br/>STATS</b>             | <b>Imputation<br/>quality<br/>metrics</b>                   | observed/expected variance<br>ratio < 0.01                                                                   | r2 > 0.3                | RSQR                                              | info>0.4 |

|                      |                                       |                                                                                                                                                                                                                                                                                                                                                                                                                                                                                                                                                                                                                                                                                                                                                  |                              |                              |                         |
|----------------------|---------------------------------------|--------------------------------------------------------------------------------------------------------------------------------------------------------------------------------------------------------------------------------------------------------------------------------------------------------------------------------------------------------------------------------------------------------------------------------------------------------------------------------------------------------------------------------------------------------------------------------------------------------------------------------------------------------------------------------------------------------------------------------------------------|------------------------------|------------------------------|-------------------------|
|                      | <b>Other SNP QC filters applied?</b>  | Imputation was preformed in a two step process. The data were imputed to HapMap Phase III using reference panels from the ASW, YRI and CEU panels. They were separately imputed using HapMap Phase II using the CEU and YRI reference panels (build 36). For each imputation the observed data was subset to the markers also observed in the given HapMap reference panel. The resulting two sets of imputed data were merged. If a marker was imputed in both the Phase II and Phase III data the Phase III data was used. Directly-genotyped SNPs that were in the HapMap samples were not overwritten, but any missing data for a genotyped SNP was filled-in using imputation. The final number snps in the imputed data set was 2,770,583. | None                         | Carried out at meta-analysis |                         |
|                      | <b>Number of SNPs in analysis</b>     | 2,603,662                                                                                                                                                                                                                                                                                                                                                                                                                                                                                                                                                                                                                                                                                                                                        | 2,649,157                    | 1,920,922                    | 2,938,825               |
| <b>DATA ANALYSIS</b> | <b>Trait transformation on Fetuin</b> | untransformed                                                                                                                                                                                                                                                                                                                                                                                                                                                                                                                                                                                                                                                                                                                                    | Untransformed                | untransformed                | untransformed           |
|                      | <b>Adjustments</b>                    | age,age2 sex, clinic site,                                                                                                                                                                                                                                                                                                                                                                                                                                                                                                                                                                                                                                                                                                                       | age, age2, sex, clinic site, | age,age2 sex, clinic site,   | age, age2, gender,2 PCs |

|                                                   |                                                                |                   |                                                                    |                   |                   |
|---------------------------------------------------|----------------------------------------------------------------|-------------------|--------------------------------------------------------------------|-------------------|-------------------|
|                                                   |                                                                | 10PC              | and 1st 3 principal components (stratified on case-control status) | 10PC              |                   |
|                                                   | <b>Analysis method</b>                                         | linear regression | linear regression                                                  | linear regression | linear regression |
|                                                   | <b>Software for analysis</b>                                   | R                 | ProbABEL with robust option                                        | mach2qtl          | SNPTEST           |
|                                                   | <b>Genomic Control Lambda</b>                                  | 1.027             | 1.006                                                              | 0.977             | 0.985             |
|                                                   | <b>adjusted r2 for full model: fetuin ~ age + sex + rs4917</b> | 0.1033            | 0.452                                                              | 0.001157          | 0.0963            |
| <b>Percentage of Variance Explained by rs4917</b> | <b>adjusted r2 for basic model: fetuin ~ age + sex</b>         | 0.0024            | 0.001                                                              | 0.004028          | 0.0409            |
|                                                   | <b>Difference between 2 models</b>                             | 0.1009            | 0.451                                                              | -0.002871         | 0.0554            |
|                                                   |                                                                |                   |                                                                    |                   |                   |

**Table S3.** Association of the top SNPs with fetuin-A levels in European Americans

| SNP        | Chr | Position  | Coded allele | Alle freq | $\beta$ | SE     | P         | Direction* | N    | Closest Gene | Distance <sup>y</sup> |
|------------|-----|-----------|--------------|-----------|---------|--------|-----------|------------|------|--------------|-----------------------|
| rs4917     | 3   | 187820407 | t            | 0.32      | -0.0657 | 0.0018 | 1.27E-303 | ----?--    | 7963 | AHSG         | 1395                  |
| rs4918     | 3   | 187821076 | c            | 0.67      | 0.0659  | 0.0018 | 5.18E-303 | ++++?++    | 7963 | AHSG         | 726                   |
| rs1900618  | 3   | 187820829 | t            | 0.67      | 0.0659  | 0.0018 | 6.44E-303 | ++++?++    | 7963 | AHSG         | 973                   |
| rs7635884  | 3   | 187823885 | t            | 0.67      | 0.0655  | 0.0018 | 8.50E-301 | ++++?++    | 7963 | AHSG         | 2083                  |
| rs13073106 | 3   | 187824754 | t            | 0.67      | 0.0651  | 0.0018 | 6.00E-300 | ++++?++    | 7963 | AHSG         | 2952                  |
| rs2593813  | 3   | 187815265 | a            | 0.67      | 0.0654  | 0.0018 | 1.95E-299 | ++++?++    | 7963 | AHSG         | 1722                  |
| rs4634107  | 3   | 187824087 | t            | 0.53      | 0.0601  | 0.0016 | 3.37E-296 | +++++++    | 9056 | AHSG         | 2285                  |
| rs2070633  | 3   | 187818635 | t            | 0.46      | -0.059  | 0.0016 | 1.27E-292 | -----      | 9055 | AHSG         | 3167                  |
| rs2518136  | 3   | 187820521 | t            | 0.49      | -0.0595 | 0.0016 | 1.73E-291 | -----      | 9055 | AHSG         | 1281                  |
| rs4498037  | 3   | 187823957 | t            | 0.24      | -0.0673 | 0.0019 | 1.99E-277 | -----      | 9056 | AHSG         | 2155                  |
| rs10937254 | 3   | 187807940 | c            | 0.24      | -0.0639 | 0.0018 | 5.03E-267 | -----      | 9055 | AHSG         | 5603                  |
| rs10937255 | 3   | 187807955 | t            | 0.76      | 0.0639  | 0.0018 | 5.05E-267 | +++++++    | 9055 | AHSG         | 5588                  |
| rs12493525 | 3   | 187806598 | a            | 0.24      | -0.0639 | 0.0018 | 9.67E-267 | -----      | 9056 | AHSG         | 6945                  |
| rs12486044 | 3   | 187810767 | t            | 0.76      | 0.0638  | 0.0018 | 1.52E-266 | +++++++    | 9055 | AHSG         | 2776                  |
| rs2248690  | 3   | 187812782 | a            | 0.76      | 0.0634  | 0.0018 | 1.69E-264 | +++++++    | 9056 | AHSG         | 761                   |
| rs6788635  | 3   | 187810815 | a            | 0.24      | -0.0632 | 0.0018 | 6.35E-264 | -----      | 9055 | AHSG         | 2728                  |
| rs1071592  | 3   | 187821119 | a            | 0.25      | -0.0675 | 0.002  | 1.64E-252 | -----      | 9056 | AHSG         | 683                   |
| rs13080283 | 3   | 187826181 | a            | 0.46      | 0.0575  | 0.0017 | 8.50E-241 | +++++++    | 9056 | AHSG         | 4379                  |
| rs1029353  | 3   | 187820927 | a            | 0.46      | 0.0574  | 0.0017 | 1.27E-240 | +++++++    | 9055 | AHSG         | 875                   |
| rs13098866 | 3   | 187822401 | a            | 0.54      | -0.0575 | 0.0017 | 1.62E-240 | -----      | 9055 | AHSG         | 599                   |
| rs2077119  | 3   | 187813156 | t            | 0.54      | -0.0572 | 0.0017 | 5.24E-238 | -----      | 9056 | AHSG         | 387                   |
| rs2070635  | 3   | 187818870 | a            | 0.54      | -0.0565 | 0.0017 | 9.80E-237 | -----      | 9056 | AHSG         | 2932                  |
| rs9814347  | 3   | 187835554 | c            | 0.51      | 0.0599  | 0.0024 | 1.66E-139 | +++++++    | 9055 | FETUB        | 5288                  |
| rs9870756  | 3   | 187827308 | t            | 0.12      | -0.0669 | 0.0027 | 3.52E-137 | -----      | 9056 | AHSG         | 5506                  |

|            |   |           |   |      |         |        |           |         |      |         |       |
|------------|---|-----------|---|------|---------|--------|-----------|---------|------|---------|-------|
| rs4686428  | 3 | 187730067 | a | 0.77 | 0.0463  | 0.002  | 2.26E-122 | +++++++ | 9056 | CRYGS   | 8859  |
| rs9846507  | 3 | 187722490 | c | 0.77 | 0.0462  | 0.002  | 2.65E-122 | +++++++ | 9056 | CRYGS   | 16436 |
| rs9846350  | 3 | 187722373 | t | 0.77 | 0.0462  | 0.002  | 2.81E-122 | +++++++ | 9056 | CRYGS   | 16553 |
| rs7627243  | 3 | 187720527 | a | 0.75 | 0.0462  | 0.002  | 9.29E-120 | +++++++ | 9056 | CRYGS   | 18399 |
| rs11717166 | 3 | 187831525 | t | 0.38 | 0.0563  | 0.0024 | 8.42E-119 | +++++++ | 9056 | FETUB   | 9317  |
| rs13084035 | 3 | 187832106 | t | 0.38 | 0.0555  | 0.0024 | 5.32E-117 | +++++++ | 9055 | FETUB   | 8736  |
| rs4686784  | 3 | 187716558 | t | 0.77 | 0.0456  | 0.002  | 7.09E-117 | +++++++ | 9056 | CRYGS   | 22368 |
| rs2377868  | 3 | 187719728 | t | 0.21 | -0.05   | 0.0022 | 1.05E-115 | -----   | 9054 | CRYGS   | 19198 |
| rs13096010 | 3 | 187833829 | a | 0.36 | 0.0594  | 0.0026 | 3.16E-115 | +++++++ | 9056 | FETUB   | 7013  |
| rs6776042  | 3 | 187772016 | a | 0.17 | -0.0531 | 0.0024 | 2.25E-110 | -----   | 9056 | DNAJB11 | 856   |
| rs2889755  | 3 | 187770471 | t | 0.16 | -0.0551 | 0.0025 | 2.60E-109 | -----   | 9056 | DNAJB11 | 689   |
| rs6444147  | 3 | 187799894 | t | 0.89 | 0.0522  | 0.0025 | 9.67E-96  | +++++++ | 9055 | DNAJB11 | 13612 |
| rs6444150  | 3 | 187808522 | t | 0.89 | 0.0528  | 0.0026 | 7.62E-93  | +++++++ | 9056 | AHSG    | 5021  |
| rs3933692  | 3 | 187800057 | t | 0.89 | 0.0524  | 0.0026 | 7.04E-92  | +++++++ | 9056 | AHSG    | 13486 |
| rs6444151  | 3 | 187808610 | c | 0.89 | 0.0527  | 0.0026 | 1.02E-91  | +++++++ | 9056 | AHSG    | 4933  |
| rs8179931  | 3 | 187798664 | t | 0.12 | -0.0523 | 0.0026 | 4.16E-91  | -----   | 9056 | DNAJB11 | 12382 |
| rs1447668  | 3 | 187827054 | t | 0.88 | 0.0509  | 0.0026 | 1.02E-86  | +++++++ | 9056 | AHSG    | 5252  |
| rs1530641  | 3 | 187718601 | t | 0.68 | 0.0294  | 0.0018 | 5.20E-57  | +++++++ | 9056 | CRYGS   | 20325 |
| rs13062057 | 3 | 187758067 | a | 0.15 | 0.0335  | 0.0024 | 1.05E-43  | +++++++ | 9056 | TBCCD1  | 9739  |
| rs1868156  | 3 | 187719527 | t | 0.85 | -0.032  | 0.0023 | 1.85E-42  | -----   | 9056 | CRYGS   | 19399 |
| rs2377869  | 3 | 187721660 | t | 0.85 | -0.0319 | 0.0023 | 2.28E-42  | -----   | 9056 | CRYGS   | 17266 |
| rs9290835  | 3 | 187801480 | a | 0.74 | 0.0261  | 0.002  | 1.91E-40  | +++++++ | 9056 | AHSG    | 12063 |
| rs11714927 | 3 | 187779572 | a | 0.60 | 0.0237  | 0.0019 | 3.95E-37  | +++++++ | 9055 | DNAJB11 | 6710  |
| rs17297584 | 3 | 187832190 | a | 0.11 | -0.0442 | 0.0035 | 4.09E-37  | -----   | 9056 | FETUB   | 8652  |
| rs4488820  | 3 | 187822311 | t | 0.92 | -0.0595 | 0.0047 | 2.20E-36  | ---+--- | 9056 | AHSG    | 509   |
| rs2280390  | 3 | 187776514 | t | 0.28 | -0.0261 | 0.0022 | 2.21E-31  | -??---- | 8559 | DNAJB11 | 5354  |
| rs16860933 | 3 | 187822954 | c | 0.93 | -0.0539 | 0.0048 | 1.35E-29  | ---+--- | 9056 | AHSG    | 1152  |
| rs4686791  | 3 | 187831567 | t | 0.28 | -0.0278 | 0.0025 | 4.82E-29  | -----   | 9056 | FETUB   | 9275  |
| rs2121752  | 3 | 187778998 | a | 0.35 | -0.0196 | 0.0019 | 2.62E-25  | -----   | 9055 | DNAJB11 | 7284  |



|            |   |           |   |      |         |        |          |         |      |         |       |
|------------|---|-----------|---|------|---------|--------|----------|---------|------|---------|-------|
| rs6763361  | 3 | 187793068 | a | 0.21 | -0.0202 | 0.0021 | 1.59E-21 | -----   | 9055 | DNAJB11 | 6786  |
| rs13073740 | 3 | 187730131 | a | 0.97 | -0.0868 | 0.0092 | 6.60E-21 | ----?-- | 7963 | CRYGS   | 8795  |
| rs3856928  | 3 | 187796265 | a | 0.79 | 0.0202  | 0.0022 | 1.48E-20 | +++++++ | 9056 | DNAJB11 | 9983  |
| rs4686799  | 3 | 187933930 | t | 0.24 | -0.0187 | 0.002  | 4.52E-20 | ---+--- | 9056 | KNG1    | 8884  |
| rs710449   | 3 | 187935514 | a | 0.23 | -0.0188 | 0.0021 | 6.27E-20 | ---+--- | 9055 | KNG1    | 7300  |
| rs10513803 | 3 | 187910755 | t | 0.57 | 0.0155  | 0.0017 | 8.21E-20 | +++++++ | 9056 | KNG1    | 7058  |
| rs13315296 | 3 | 187911695 | t | 0.57 | 0.0155  | 0.0017 | 1.08E-19 | +++++++ | 9056 | KNG1    | 6118  |
| rs9817038  | 3 | 187912118 | t | 0.57 | 0.0155  | 0.0017 | 1.12E-19 | +++++++ | 9055 | KNG1    | 5695  |
| rs11918665 | 3 | 187696478 | a | 0.13 | -0.0234 | 0.0026 | 1.79E-19 | -----   | 9056 | CRYGS   | 42448 |
| rs1868149  | 3 | 187703499 | a | 0.12 | -0.0243 | 0.0029 | 2.07E-17 | ---+--- | 9056 | CRYGS   | 35427 |
| rs1868146  | 3 | 187704565 | a | 0.12 | -0.025  | 0.0029 | 2.39E-17 | ---+--- | 9056 | CRYGS   | 34361 |
| rs1868145  | 3 | 187705041 | t | 0.11 | -0.0255 | 0.003  | 2.95E-17 | ---+--- | 9056 | CRYGS   | 33885 |
| rs1868152  | 3 | 187702757 | a | 0.13 | -0.0234 | 0.0028 | 1.87E-16 | -----   | 9056 | CRYGS   | 36169 |
| rs4686787  | 3 | 187746909 | t | 0.97 | 0.0623  | 0.0076 | 3.19E-16 | ?++++++ | 6314 | TBCCD1  | 86    |
| rs9830330  | 3 | 187743712 | t | 0.97 | 0.0621  | 0.0076 | 3.89E-16 | ?++++++ | 6314 | CRYGS   | 1149  |
| rs843991   | 3 | 187999122 | t | 0.51 | 0.0132  | 0.0017 | 2.63E-14 | +++++++ | 9056 | RFC4    | 7862  |
| rs710450   | 3 | 188005327 | a | 0.54 | 0.0135  | 0.0018 | 2.80E-14 | +++++++ | 9056 | RFC4    | 1657  |
| rs266754   | 3 | 187991660 | t | 0.47 | -0.0133 | 0.0018 | 3.33E-14 | -----   | 9055 | EIF4A2  | 1283  |
| rs6787877  | 3 | 187792995 | c | 0.71 | 0.0141  | 0.0019 | 3.98E-14 | +++++++ | 9055 | DNAJB11 | 6713  |
| rs187868   | 3 | 187992211 | a | 0.47 | -0.0131 | 0.0017 | 4.54E-14 | -----   | 9055 | EIF4A2  | 1834  |
| rs3846211  | 3 | 187789235 | t | 0.30 | -0.014  | 0.0019 | 4.58E-14 | -----   | 9056 | DNAJB11 | 2953  |
| rs266759   | 3 | 187991006 | t | 0.48 | -0.0131 | 0.0017 | 4.68E-14 | -----   | 9055 | EIF4A2  | 629   |
| rs11921733 | 3 | 187781801 | a | 0.09 | 0.0228  | 0.003  | 5.21E-14 | +++++++ | 9056 | DNAJB11 | 4481  |
| rs7645347  | 3 | 187701643 | a | 0.39 | 0.014   | 0.0019 | 6.10E-14 | +++++++ | 9055 | CRYGS   | 37283 |
| rs3936433  | 3 | 187794438 | a | 0.29 | -0.0139 | 0.0019 | 1.40E-13 | -----   | 9055 | DNAJB11 | 8156  |
| rs185554   | 3 | 187977116 | a | 0.46 | -0.0134 | 0.0018 | 1.53E-13 | -----   | 9056 | EIF4A2  | 6938  |
| rs182051   | 3 | 187980192 | t | 0.23 | -0.0167 | 0.0023 | 1.63E-13 | -----   | 9056 | EIF4A2  | 3862  |
| rs11918289 | 3 | 187914126 | a | 0.33 | -0.0134 | 0.0018 | 1.98E-13 | -----   | 9056 | KNG1    | 3687  |
| rs745588   | 3 | 187712697 | t | 0.80 | -0.0199 | 0.0027 | 3.33E-13 | -----   | 9056 | CRYGS   | 26229 |

|            |   |           |   |      |         |        |          |         |      |         |       |
|------------|---|-----------|---|------|---------|--------|----------|---------|------|---------|-------|
| rs4686429  | 3 | 187744041 | a | 0.09 | 0.0219  | 0.0031 | 7.22E-13 | +++++++ | 9056 | CRYGS   | 820   |
| rs3774803  | 3 | 187742653 | t | 0.09 | 0.0219  | 0.0031 | 8.28E-13 | +++++++ | 9056 | CRYGS   | 2208  |
| rs16860878 | 3 | 187738205 | t | 0.09 | 0.0218  | 0.0031 | 8.78E-13 | +++++++ | 9056 | CRYGS   | 721   |
| rs266733   | 3 | 187976007 | t | 0.53 | 0.0129  | 0.0018 | 1.04E-12 | +++++++ | 9051 | EIF4A2  | 8047  |
| rs1656941  | 3 | 188001835 | a | 0.77 | 0.0149  | 0.0021 | 1.72E-12 | +++++++ | 9056 | RFC4    | 5149  |
| rs2889756  | 3 | 187735465 | a | 0.91 | -0.0211 | 0.003  | 1.76E-12 | -----   | 9056 | CRYGS   | 3461  |
| rs1648703  | 3 | 188001830 | a | 0.77 | 0.0149  | 0.0021 | 1.90E-12 | +++++++ | 9056 | RFC4    | 5154  |
| rs1621816  | 3 | 187921867 | t | 0.72 | -0.0136 | 0.0019 | 2.23E-12 | ---+--- | 9056 | KNG1    | 4054  |
| rs3917113  | 3 | 188000310 | a | 0.78 | 0.0153  | 0.0022 | 2.42E-12 | +++++++ | 9056 | RFC4    | 6674  |
| rs5030072  | 3 | 187938240 | t | 0.56 | -0.0123 | 0.0018 | 4.35E-12 | -----   | 9056 | KNG1    | 4574  |
| rs9833880  | 3 | 187779703 | t | 0.18 | 0.0152  | 0.0022 | 7.77E-12 | +++++++ | 9055 | DNAJB11 | 6579  |
| rs9870051  | 3 | 187692542 | t | 0.78 | 0.0165  | 0.0024 | 8.33E-12 | +++++++ | 9055 | CRYGS   | 46384 |
| rs10937253 | 3 | 187781338 | a | 0.82 | -0.0152 | 0.0022 | 8.91E-12 | ---+--- | 9055 | DNAJB11 | 4944  |
| rs13326516 | 3 | 187784534 | t | 0.82 | -0.0151 | 0.0022 | 9.02E-12 | ---+--- | 9055 | DNAJB11 | 1748  |
| rs9859857  | 3 | 187781036 | t | 0.82 | -0.0152 | 0.0022 | 9.95E-12 | ---+--- | 9055 | DNAJB11 | 5246  |
| rs11928493 | 3 | 187781516 | a | 0.82 | -0.0152 | 0.0022 | 1.03E-11 | ---+--- | 9055 | DNAJB11 | 4766  |
| rs9840074  | 3 | 187781075 | a | 0.18 | 0.0152  | 0.0022 | 1.04E-11 | +++++++ | 9056 | DNAJB11 | 5207  |
| rs7624836  | 3 | 187779264 | c | 0.18 | 0.0152  | 0.0022 | 1.10E-11 | +++++++ | 9055 | DNAJB11 | 7018  |
| rs2280389  | 3 | 187776584 | t | 0.84 | -0.0161 | 0.0024 | 1.10E-11 | -----   | 9055 | DNAJB11 | 5424  |
| rs7622195  | 3 | 187778948 | t | 0.18 | 0.0152  | 0.0022 | 1.18E-11 | +++++++ | 9055 | DNAJB11 | 7334  |
| rs8147     | 3 | 187784397 | a | 0.82 | -0.0149 | 0.0022 | 1.32E-11 | ---+--- | 9055 | DNAJB11 | 1885  |
| rs6784026  | 3 | 187782599 | t | 0.82 | -0.0149 | 0.0022 | 1.46E-11 | ---+--- | 9055 | DNAJB11 | 3683  |
| rs9851299  | 3 | 187783377 | t | 0.18 | 0.0149  | 0.0022 | 1.48E-11 | +++++++ | 9055 | DNAJB11 | 2905  |
| rs6770868  | 3 | 187782308 | a | 0.18 | 0.0149  | 0.0022 | 1.54E-11 | +++++++ | 9055 | DNAJB11 | 3974  |
| rs713484   | 3 | 187772367 | t | 0.82 | -0.0151 | 0.0022 | 1.55E-11 | ---+--- | 9055 | DNAJB11 | 1207  |
| rs7609902  | 3 | 187774993 | t | 0.18 | 0.0151  | 0.0022 | 1.56E-11 | +++++++ | 9055 | DNAJB11 | 3833  |
| rs2280388  | 3 | 187776642 | a | 0.82 | -0.015  | 0.0022 | 1.81E-11 | ---+--- | 9056 | DNAJB11 | 5482  |
| rs2280391  | 3 | 187776282 | a | 0.82 | -0.015  | 0.0022 | 1.86E-11 | ---+--- | 9056 | DNAJB11 | 5122  |
| rs12330397 | 3 | 187770674 | t | 0.83 | -0.0157 | 0.0024 | 2.42E-11 | ---+--- | 9056 | DNAJB11 | 486   |

|            |    |           |   |      |         |        |          |         |      |         |       |
|------------|----|-----------|---|------|---------|--------|----------|---------|------|---------|-------|
| rs2228243  | 3  | 187877807 | a | 0.80 | -0.0145 | 0.0022 | 3.56E-11 | ---+--- | 9053 | HRG     | 909   |
| rs12330139 | 3  | 187770343 | t | 0.17 | 0.0155  | 0.0023 | 3.89E-11 | +++++++ | 9056 | DNAJB11 | 817   |
| rs7642903  | 3  | 187695671 | t | 0.34 | 0.0125  | 0.0019 | 4.01E-11 | +++++++ | 9055 | CRYGS   | 43255 |
| rs12330875 | 3  | 187768680 | t | 0.17 | 0.0149  | 0.0023 | 4.13E-11 | +++++++ | 9056 | TBCCD1  | 874   |
| rs16860992 | 3  | 187876732 | c | 0.20 | 0.0145  | 0.0022 | 5.74E-11 | +++++++ | 9056 | HRG     | 1984  |
| rs5030023  | 3  | 187927338 | a | 0.23 | 0.0133  | 0.002  | 6.04E-11 | +++0+++ | 9056 | KNG1    | 9525  |
| rs1047148  | 3  | 187990451 | a | 0.14 | 0.0197  | 0.003  | 7.05E-11 | +++++++ | 9055 | EIF4A2  | 74    |
| rs5030062  | 3  | 187936874 | a | 0.62 | -0.0114 | 0.0017 | 7.14E-11 | -----   | 9056 | KNG1    | 5940  |
| rs5030028  | 3  | 187928448 | t | 0.23 | 0.0132  | 0.002  | 7.41E-11 | +++0+++ | 9056 | KNG1    | 10635 |
| rs16861189 | 3  | 188018128 | c | 0.55 | 0.0127  | 0.002  | 9.13E-11 | +++++++ | 9056 | RFC4    | 11144 |
| rs13094303 | 3  | 188016808 | t | 0.45 | -0.0127 | 0.002  | 9.23E-11 | -----   | 9056 | RFC4    | 9824  |
| rs6780323  | 3  | 187702792 | a | 0.67 | -0.013  | 0.002  | 1.22E-10 | -----   | 9055 | CRYGS   | 36134 |
| rs9878039  | 3  | 187691172 | a | 0.90 | 0.0189  | 0.0029 | 1.45E-10 | +++++++ | 9056 | CRYGS   | 47754 |
| rs9836109  | 3  | 187679848 | a | 0.10 | -0.0189 | 0.003  | 2.18E-10 | -----   | 9056 | CRYGS   | 59078 |
| rs11017848 | 10 | 132949189 | t | 0.99 | -0.2091 | 0.0332 | 2.88E-10 | ?????-- | 4333 | TCERG1L | 50785 |
| rs4686794  | 3  | 187881384 | a | 0.53 | -0.0141 | 0.0023 | 4.05E-10 | -----   | 9056 | HRG     | 2668  |
| rs1447670  | 3  | 187737526 | a | 0.85 | -0.0146 | 0.0024 | 1.34E-09 | ---+--- | 9055 | CRYGS   | 1400  |
| rs9898     | 3  | 187873321 | t | 0.34 | 0.0111  | 0.0018 | 1.63E-09 | +++++++ | 9055 | HRG     | 5395  |
| rs1868154  | 3  | 187857365 | a | 0.55 | -0.0106 | 0.0018 | 3.11E-09 | ---+--- | 9055 | FETUB   | 3875  |
| rs1868143  | 3  | 187705664 | t | 0.17 | -0.0154 | 0.0026 | 6.61E-09 | ---+--- | 9044 | CRYGS   | 33262 |
| rs1131364  | 3  | 187853027 | t | 0.46 | 0.0103  | 0.0018 | 7.05E-09 | +++0+++ | 9055 | FETUB   | 463   |
| rs4615068  | 3  | 187572403 | t | 0.17 | -0.0144 | 0.0025 | 1.04E-08 | ---+--- | 9055 | DGKG    | 9686  |
| rs1426810  | 3  | 187986129 | a | 0.62 | -0.0099 | 0.0018 | 1.59E-08 | +-----  | 9056 | EIF4A2  | 2075  |
| rs11720187 | 3  | 187860423 | t | 0.54 | -0.01   | 0.0018 | 1.62E-08 | ---+--- | 9056 | HRG     | 6068  |
| rs3733159  | 3  | 187843103 | t | 0.68 | -0.0105 | 0.0019 | 1.76E-08 | -----   | 9056 | FETUB   | 2261  |
| rs6796803  | 3  | 187946801 | t | 0.27 | -0.0124 | 0.0022 | 2.96E-08 | -----   | 9056 | KNG1    | 2366  |
| rs6809265  | 3  | 187664220 | a | 0.24 | -0.0121 | 0.0022 | 3.26E-08 | ---+--- | 9056 | CRYGS   | 74706 |
| rs1042464  | 3  | 187878266 | a | 0.52 | -0.0095 | 0.0018 | 6.17E-08 | ---+--- | 9056 | HRG     | 450   |
| rs3856930  | 3  | 187941016 | t | 0.35 | 0.0097  | 0.0018 | 8.29E-08 | +++++++ | 9056 | KNG1    | 1798  |

\*Direction: shows the direction of the association for the coded allele in each cohort in the following order: CHS, ARIC set 1, ARIC set 2, HABC, MESA, NHS, FHS.

<sup>Y</sup>Distance: is the distance in base pairs from the closest known gene

**Table S4.** Association of the top SNPs with fetuin-A levels in African Americans

| SNP        | Chr | Position  | Coded allele | MAF  | $\beta$ | SE     | p        | Direction* | N    | Closest Gene | Distance <sup>Y</sup> |
|------------|-----|-----------|--------------|------|---------|--------|----------|------------|------|--------------|-----------------------|
| rs1900618  | 3   | 187820829 | t            | 0.67 | 0.0477  | 0.003  | 1.58E-56 | +++++      | 2119 | AHSG         | 973                   |
| rs10937254 | 3   | 187807940 | c            | 0.31 | -0.0467 | 0.0033 | 9.31E-47 | ----       | 2119 | AHSG         | 5603                  |
| rs2593813  | 3   | 187815265 | a            | 0.62 | 0.0436  | 0.003  | 9.49E-47 | +++++      | 2119 | AHSG         | 1722                  |
| rs12486044 | 3   | 187810767 | t            | 0.74 | 0.047   | 0.0033 | 9.31E-46 | +++++      | 2119 | AHSG         | 2776                  |
| rs6788635  | 3   | 187810815 | a            | 0.26 | -0.0469 | 0.0033 | 9.36E-46 | ----       | 2119 | AHSG         | 2728                  |
| rs10937255 | 3   | 187807955 | t            | 0.74 | 0.047   | 0.0033 | 1.03E-45 | +++++      | 2119 | AHSG         | 5588                  |
| rs4917     | 3   | 187820407 | t            | 0.26 | -0.0413 | 0.0034 | 1.20E-34 | ---+       | 2119 | AHSG         | 1395                  |
| rs7635884  | 3   | 187823885 | t            | 0.76 | 0.0426  | 0.0035 | 4.82E-34 | +++++      | 2118 | AHSG         | 2083                  |
| rs4498037  | 3   | 187823957 | t            | 0.15 | -0.0476 | 0.0041 | 1.13E-30 | ----       | 2119 | AHSG         | 2155                  |
| rs12493525 | 3   | 187806598 | a            | 0.23 | -0.0391 | 0.0037 | 2.46E-26 | ----       | 2119 | AHSG         | 6945                  |
| rs2518136  | 3   | 187820521 | t            | 0.68 | -0.0352 | 0.0034 | 1.57E-25 | ---+       | 2119 | AHSG         | 1281                  |
| rs2070633  | 3   | 187818635 | t            | 0.66 | -0.0341 | 0.0033 | 2.05E-24 | ----       | 2119 | AHSG         | 3167                  |
| rs4634107  | 3   | 187824087 | t            | 0.30 | 0.0355  | 0.0035 | 1.07E-23 | +++++      | 2118 | AHSG         | 2285                  |
| rs4918     | 3   | 187821076 | c            | 0.66 | 0.0435  | 0.0045 | 2.36E-22 | ?++++      | 1394 | AHSG         | 726                   |
| rs1071592  | 3   | 187821119 | a            | 0.16 | -0.0493 | 0.0051 | 4.18E-22 | ---??      | 1091 | AHSG         | 683                   |
| rs2248690  | 3   | 187812782 | a            | 0.73 | 0.0318  | 0.0035 | 2.93E-20 | +++++      | 2118 | AHSG         | 761                   |
| rs8179931  | 3   | 187798664 | t            | 0.18 | -0.0342 | 0.004  | 6.09E-18 | ---?-      | 1769 | DNAJB11      | 12382                 |
| rs16860933 | 3   | 187822954 | c            | 0.84 | -0.0391 | 0.0046 | 1.09E-17 | ---?-      | 1769 | AHSG         | 1152                  |
| rs6444147  | 3   | 187799894 | t            | 0.82 | 0.0334  | 0.0039 | 1.14E-17 | +++?+      | 1769 | DNAJB11      | 13612                 |
| rs1447668  | 3   | 187827054 | t            | 0.95 | 0.0533  | 0.0064 | 9.50E-17 | +++++      | 2119 | AHSG         | 5252                  |
| rs4488820  | 3   | 187822311 | t            | 0.83 | -0.0321 | 0.0043 | 4.86E-14 | ----       | 2119 | AHSG         | 509                   |
| rs3933692  | 3   | 187800057 | t            | 0.77 | 0.0269  | 0.0037 | 2.30E-13 | +++?+      | 1768 | AHSG         | 13486                 |
| rs9870756  | 3   | 187827308 | t            | 0.09 | -0.0413 | 0.0057 | 5.52E-13 | -+---      | 2119 | AHSG         | 5506                  |
| rs2377868  | 3   | 187719728 | t            | 0.16 | -0.028  | 0.004  | 3.48E-12 | ----       | 2117 | CRYGS        | 19198                 |
| rs10962420 | 9   | 16413076  | a            | 0.98 | -0.1378 | 0.0203 | 1.16E-11 | ?--?-      | 1044 | BNC2         | 13575                 |
| rs9846507  | 3   | 187722490 | c            | 0.83 | 0.0276  | 0.0041 | 1.70E-11 | +++++      | 2119 | CRYGS        | 16436                 |

|            |   |           |   |      |         |        |          |       |      |       |        |
|------------|---|-----------|---|------|---------|--------|----------|-------|------|-------|--------|
| rs17297964 | 4 | 120969220 | a | 0.99 | 0.0868  | 0.0135 | 1.43E-10 | +++?? | 1091 | PDE5A | 199791 |
| rs6444150  | 3 | 187808522 | t | 0.91 | 0.0344  | 0.0054 | 2.23E-10 | +++?+ | 1769 | AHSG  | 5021   |
| rs1029353  | 3 | 187820927 | a | 0.13 | 0.0298  | 0.0048 | 4.57E-10 | +++++ | 2119 | AHSG  | 875    |
| rs2077119  | 3 | 187813156 | t | 0.88 | -0.0303 | 0.0049 | 8.42E-10 | ---+- | 2119 | AHSG  | 387    |
| rs9846350  | 3 | 187722373 | t | 0.79 | 0.0232  | 0.0038 | 1.58E-09 | +++++ | 2119 | CRYGS | 16553  |
| rs9872086  | 3 | 187828594 | t | 0.58 | -0.0189 | 0.0032 | 4.96E-09 | -+--- | 2119 | AHSG  | 6792   |
| rs17384987 | 3 | 154009694 | t | 0.99 | -0.1212 | 0.0208 | 5.76E-09 | ?+?-  | 1044 | P2RY1 | 25731  |
| rs13098866 | 3 | 187822401 | a | 0.89 | -0.0293 | 0.0051 | 8.05E-09 | ---?- | 1769 | AHSG  | 599    |
| rs17217936 | 4 | 182981555 | t | 0.99 | -0.1071 | 0.0186 | 9.08E-09 | -???  | 1403 | ODZ3  | 500575 |
| rs17297584 | 3 | 187832190 | a | 0.05 | -0.0404 | 0.0071 | 1.06E-08 | ---?- | 1769 | FETUB | 8652   |
| rs16878361 | 4 | 26070983  | a | 0.01 | -0.0558 | 0.0098 | 1.16E-08 | -+?-  | 1769 | CCKAR | 21132  |
| rs13080283 | 3 | 187826181 | a | 0.11 | 0.0285  | 0.0051 | 2.03E-08 | +++?+ | 1769 | AHSG  | 4379   |
| rs2070635  | 3 | 187818870 | a | 0.88 | -0.0271 | 0.0048 | 2.32E-08 | ---+- | 2119 | AHSG  | 2932   |
| rs6444151  | 3 | 187808610 | c | 0.94 | 0.0352  | 0.0064 | 4.34E-08 | +++++ | 2116 | AHSG  | 4933   |
| rs4686428  | 3 | 187730067 | a | 0.86 | 0.029   | 0.0053 | 4.96E-08 | +++?? | 1091 | CRYGS | 8859   |
| rs4686432  | 3 | 187800551 | t | 0.33 | 0.0177  | 0.0033 | 6.33E-08 | +++++ | 2119 | AHSG  | 12992  |

\*Direction: shows the direction of the association for the coded allele in each cohort in the following order: : CHS, ARIC set 1, ARIC set 2, HABC, MESA.

<sup>Y</sup>Distance: is the distance in base pairs from the closest known gene

**Figure S1:** Meta-analysis of six genome-wide association analyses of fetuin-A levels in a total of 9,055 European Americans. Figure displays p-value for association for each SNP on a  $-\log_{10}$  scale.

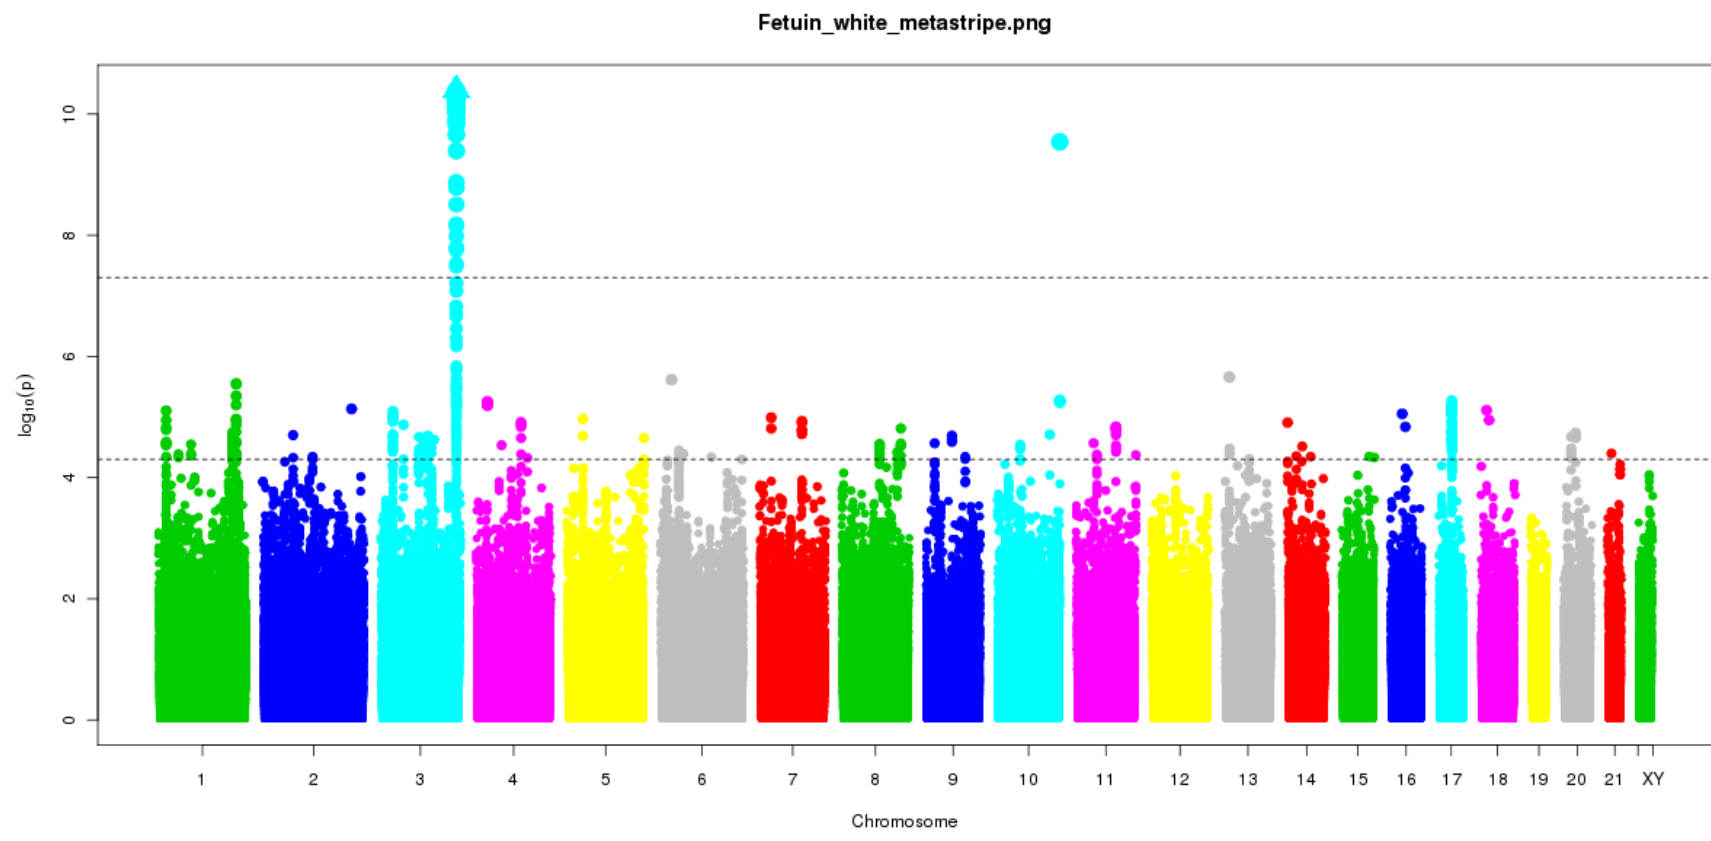





**Figure S2B:** Display of genetic region and LD of SNPs that were associated with fetuin-A levels ( $p < 5 \times 10^{-8}$ ) among European American participants, zoomed in on region around rs4917. Light blue dots represent variants in low LD ( $0.2 < r^2 < 0.4$ ) with rs4917 (rs2077119; rs2070635; rs1029353; rs13098866; rs13080283).

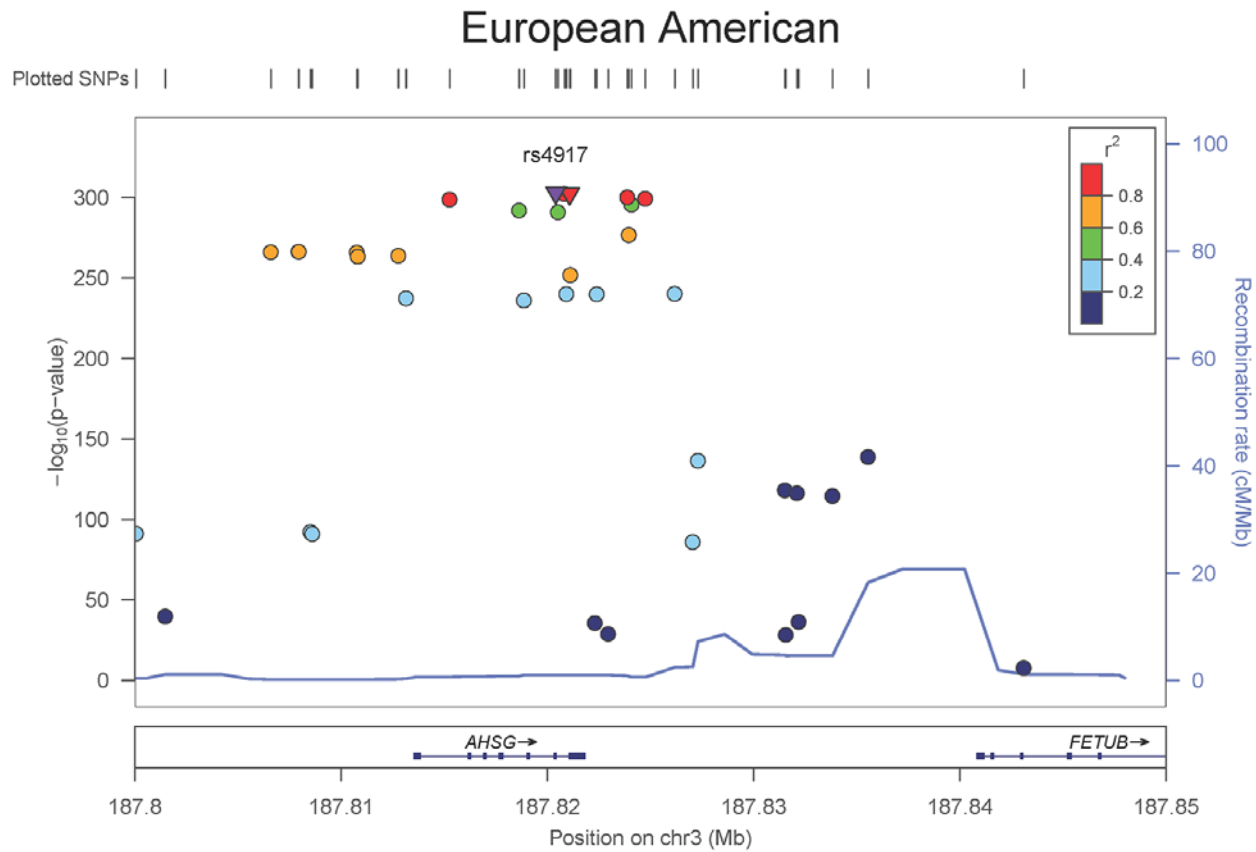

**Figure S3:** Meta-analysis of six genome-wide association analyses of fetuin-A levels in a total of 2,119 African Americans. Figure displays p-value for association for each SNP on a  $-\log_{10}$  scale.

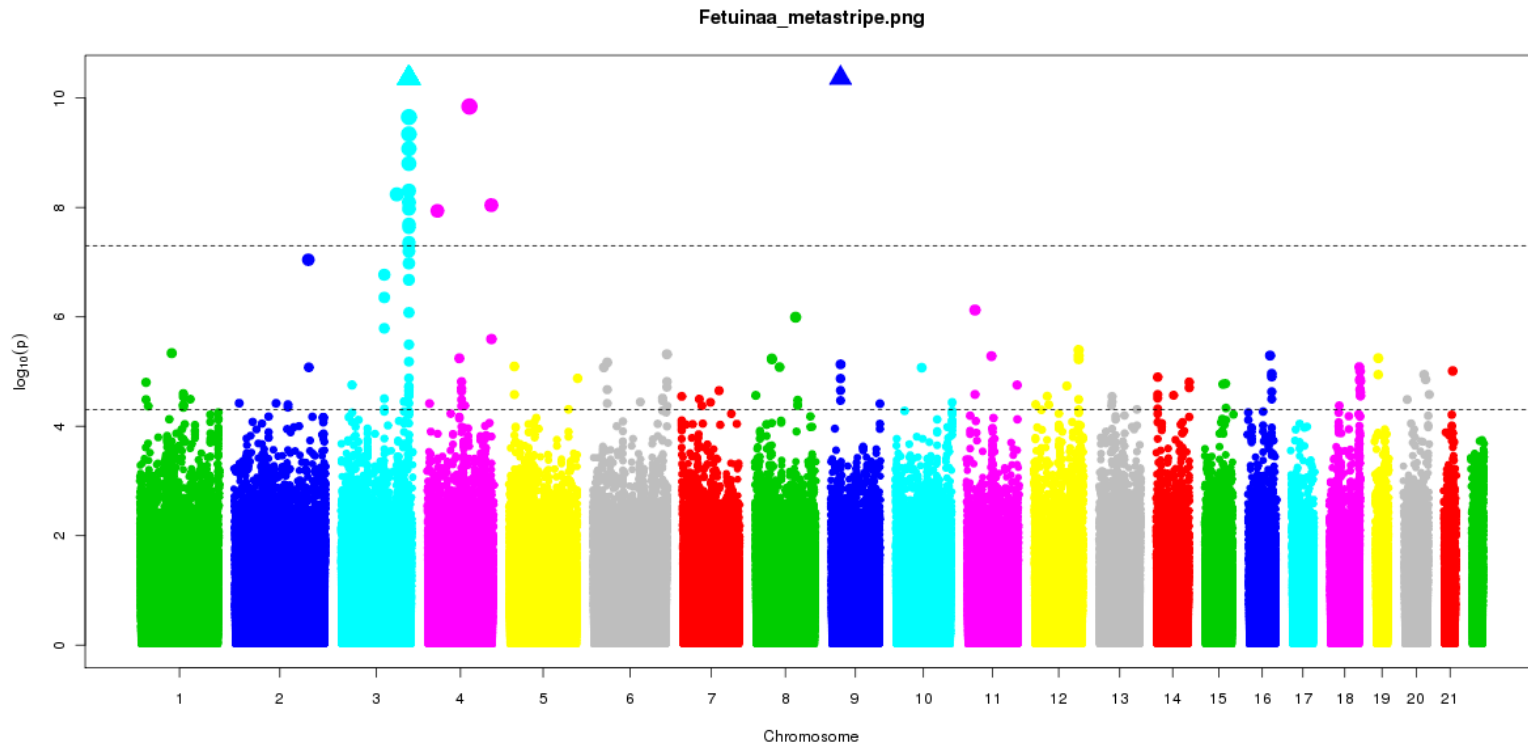

**Figure S4.** Display of genetic region and LD of SNPs that were associated with fetuin-A levels ( $p < 5 \times 10^{-8}$ ) among African American participants

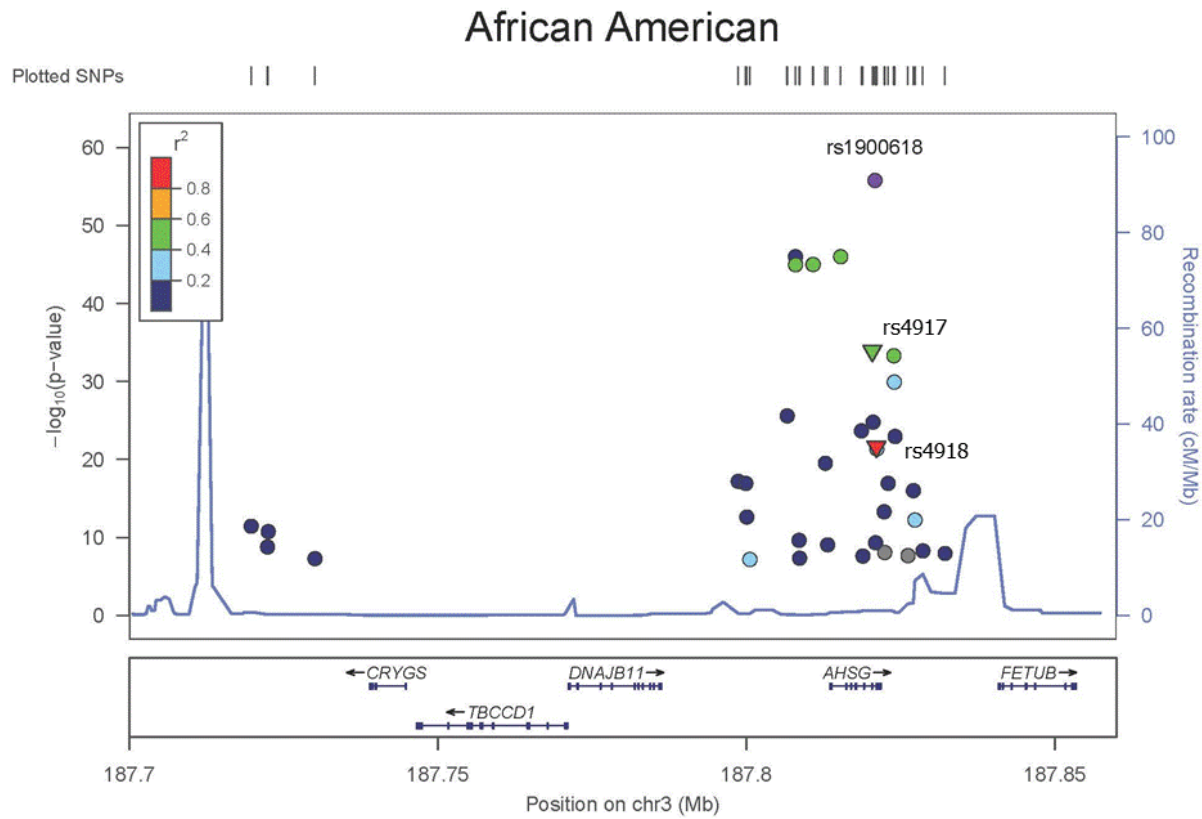

**Figure S5.** Meta-analysis of six genome-wide association analyses of fetuin-A levels in European American participants, conditional on rs4917. Figure displays p-value for association for each SNP on a  $-\log_{10}$  scale.

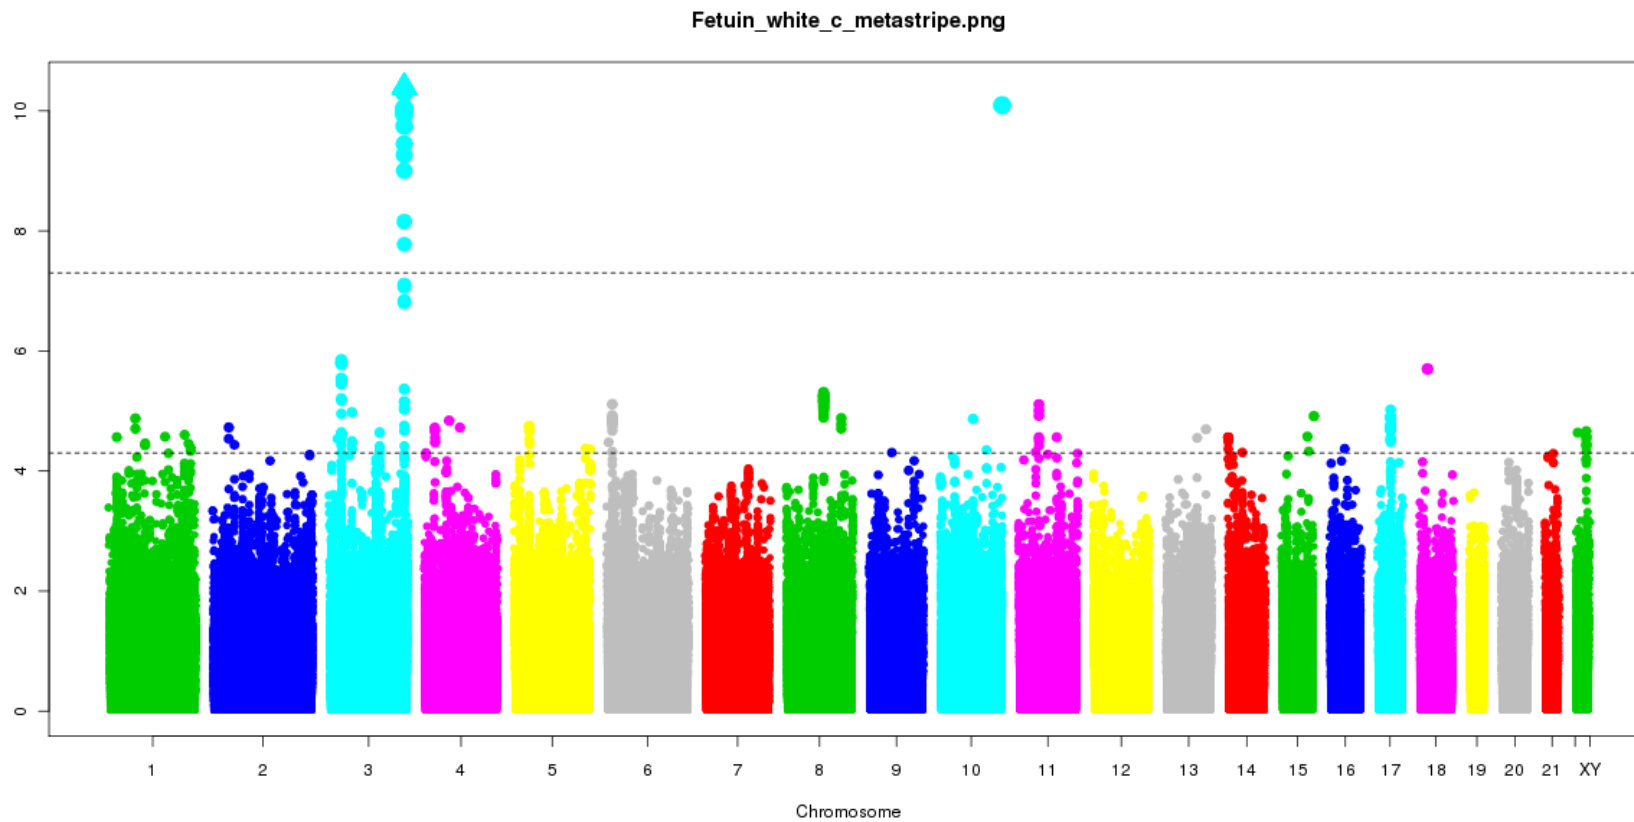

**Figure S6.** Meta-analysis of four genome-wide association analyses of fetuin-A levels in African Americans, conditional on rs4917.

Figure displays p-value for association for each SNP on a  $-\log_{10}$  scale

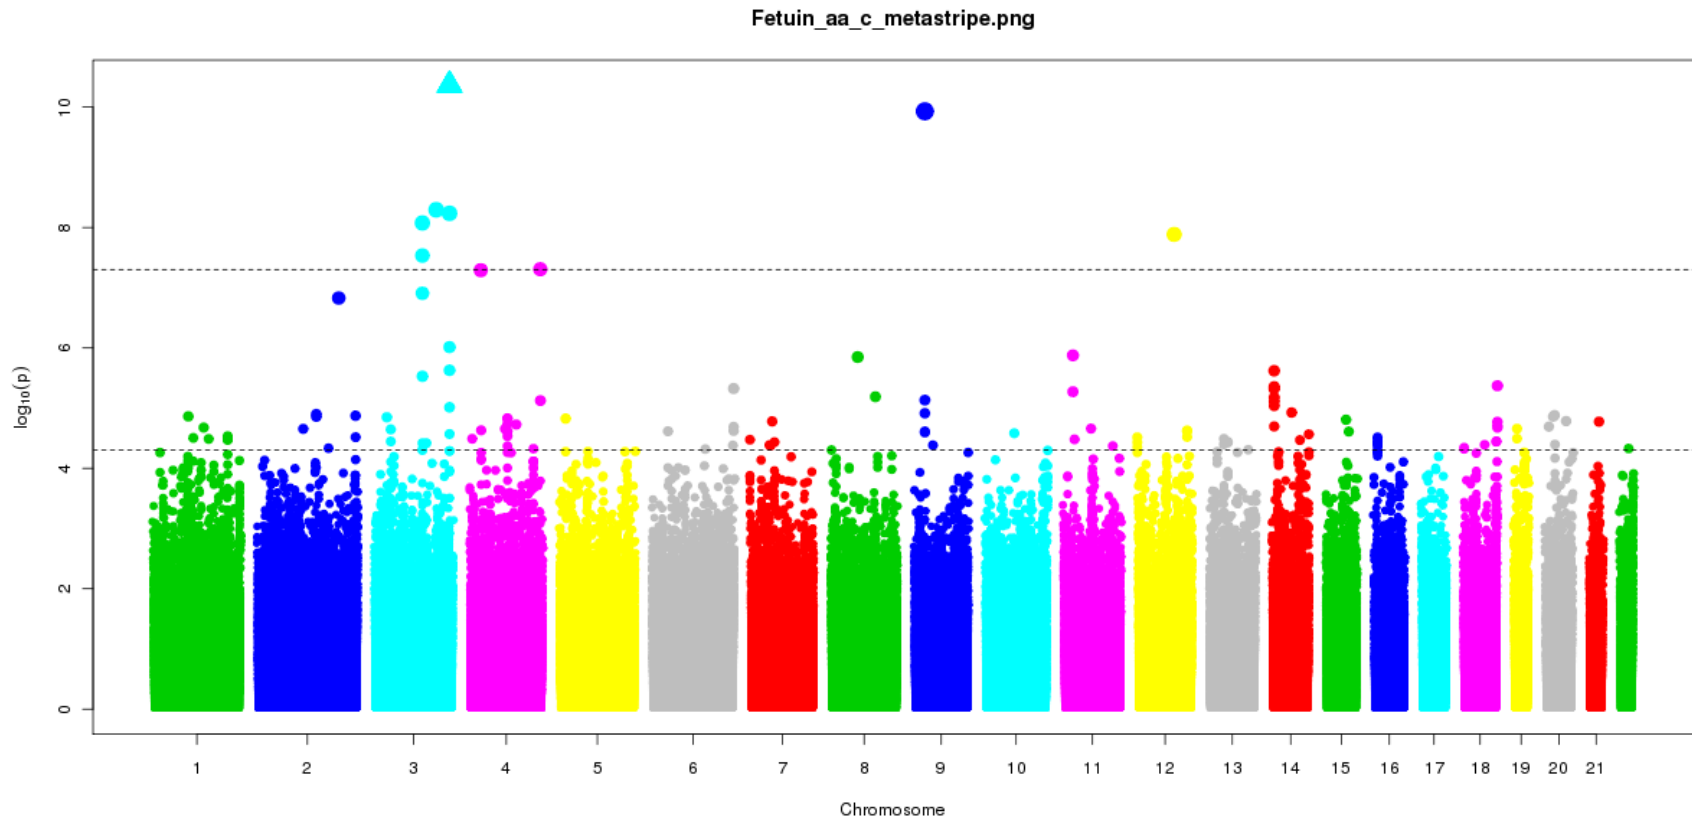

Supplement: ddx091_supp.pdf [file ddx091_supp.pdf]
